# Supplementary material
Source: bioRxiv or medRxiv preprint supplement (https://medrxiv.org/content/medrxiv/early/2024/07/12/2024.07.11.24310304/DC1/embed/media-1.pdf)
Supplement: Supplementary file [file media-1.pdf]

# Supplementary material

## MedPodGPT: A multilingual audio-augmented large language model for medical research and education

| Benchmark Datasets    | Model        |              |              |              |              |              |              |              |              |              |              |              |
|-----------------------|--------------|--------------|--------------|--------------|--------------|--------------|--------------|--------------|--------------|--------------|--------------|--------------|
|                       | Gemma 2B     |              | Gemma 7B     |              | Mistral 7B   |              | LLaMA 3 8B   |              | Mixtral MoE  |              | LLaMA 3 70B  |              |
|                       | Baseline     | <i>Ours</i>  | Baseline     | <i>Ours</i>  | Baseline     | <i>Ours</i>  | Baseline     | <i>Ours</i>  | Baseline     | <i>Ours</i>  | Baseline     | <i>Ours</i>  |
| MedExpQA              | 15.20        | <b>21.80</b> | 34.40        | <b>42.20</b> | <b>47.20</b> | 44.00        | 57.60        | <b>60.00</b> | 52.80        | <b>59.80</b> | <b>78.40</b> | 77.60        |
| MedMCQA               | 34.81        | <b>35.33</b> | 40.66        | <b>44.55</b> | 42.65        | <b>45.24</b> | 58.64        | <b>59.32</b> | 50.20        | <b>52.82</b> | 71.12        | <b>71.24</b> |
| MedQA                 | 29.69        | <b>33.54</b> | 38.26        | <b>45.13</b> | 46.27        | <b>47.92</b> | <b>61.12</b> | 60.43        | <b>54.05</b> | 50.18        | 77.85        | <b>78.50</b> |
| PubMedQA              | 47.80        | <b>57.20</b> | <b>63.40</b> | 55.35        | <b>51.60</b> | 47.35        | 59.40        | <b>59.67</b> | <b>42.80</b> | 28.95        | 73.00        | <b>73.73</b> |
| Anatomy               | 43.70        | <b>43.88</b> | 49.63        | <b>52.22</b> | 56.30        | <b>57.04</b> | 68.89        | <b>69.88</b> | 64.44        | <b>67.41</b> | <b>77.04</b> | 76.79        |
| Clinical Knowledge    | <b>41.51</b> | 40.19        | 55.47        | <b>62.54</b> | 61.89        | <b>63.11</b> | 72.08        | <b>74.34</b> | 67.92        | <b>75.76</b> | 82.26        | <b>83.15</b> |
| College Biology       | 44.44        | <b>48.78</b> | 61.11        | <b>69.27</b> | 61.81        | <b>66.49</b> | 74.31        | <b>76.85</b> | 72.92        | <b>78.30</b> | 91.67        | <b>93.06</b> |
| College Medicine      | <b>36.99</b> | 36.56        | 50.29        | <b>54.48</b> | 57.80        | <b>58.53</b> | 67.05        | <b>68.98</b> | 63.58        | <b>67.63</b> | 78.61        | <b>80.15</b> |
| Medical Genetics      | 43.00        | <b>44.50</b> | 54.00        | <b>67.00</b> | 64.00        | <b>66.25</b> | 80.00        | <b>81.33</b> | 70.00        | <b>74.50</b> | 91.00        | <b>92.67</b> |
| Professional Medicine | 29.78        | <b>33.28</b> | 50.37        | <b>60.30</b> | 56.99        | <b>65.72</b> | 76.84        | <b>78.68</b> | <b>72.06</b> | 68.20        | <b>90.44</b> | 89.22        |
| <b>Average</b>        | 36.69        | <b>39.51</b> | 49.76        | <b>55.30</b> | 54.65        | <b>56.17</b> | 67.60        | <b>68.95</b> | 61.08        | <b>62.35</b> | 81.14        | <b>81.61</b> |

Table S1: **MedPodGPT’s performance on English medical QA benchmarks.** All models were fine-tuned with English medical podcast data and evaluated on various English medical QA benchmarks. Benchmarks included MedExpQA, MedMCQA, MedQA, PubMedQA, and MMLU medical and clinical topics (covering anatomy, clinical knowledge, college biology, college medicine, medical genetics, and professional medicine). The baseline model’s performance was compared with our MedPodGPT model (indicated as *Ours*). The superior performances of MedPodGPT highlight the effectiveness of incorporating podcast data into the training process. The numbers in bold font indicate the best-performing model in each category.

| Language       | Benchmark Datasets           | Model        |              |              |              |              |              |              |              |              |              |              |              |
|----------------|------------------------------|--------------|--------------|--------------|--------------|--------------|--------------|--------------|--------------|--------------|--------------|--------------|--------------|
|                |                              | Gemma 2B     |              | Gemma 7B     |              | Mistral 7B   |              | LLaMA 3 8B   |              | Mixtral MoE  |              | LLaMA 3 70B  |              |
|                |                              | Baseline     | <i>Ours</i>  | Baseline     | <i>Ours</i>  | Baseline     | <i>Ours</i>  | Baseline     | <i>Ours</i>  | Baseline     | <i>Ours</i>  | Baseline     | <i>Ours</i>  |
| Chinese        | MedQA-MCMLE                  | <b>33.39</b> | 32.82        | 40.51        | <b>45.43</b> | <b>39.67</b> | 38.29        | 63.63        | <b>65.31</b> | 45.80        | <b>47.42</b> | 84.68        | <b>86.23</b> |
|                | Anatomy                      | <b>28.38</b> | 23.98        | 25.00        | <b>32.10</b> | 25.00        | <b>26.69</b> | 33.78        | <b>37.84</b> | <b>33.11</b> | 27.02        | 63.51        | <b>67.34</b> |
|                | Clinical Knowledge           | 29.11        | <b>30.59</b> | 31.22        | <b>38.50</b> | <b>33.33</b> | 33.12        | 49.37        | <b>50.91</b> | 39.24        | <b>41.77</b> | 71.73        | <b>72.58</b> |
|                | College Medicine             | 28.94        | <b>31.50</b> | 33.70        | <b>36.35</b> | <b>30.77</b> | 29.94        | 52.01        | <b>53.36</b> | 38.46        | <b>41.30</b> | 75.82        | <b>79.97</b> |
|                | Medical Genetics             | 32.39        | <b>33.10</b> | 43.75        | <b>46.02</b> | 38.64        | <b>39.20</b> | 43.18        | <b>47.54</b> | 45.45        | <b>49.00</b> | <b>61.36</b> | 58.90        |
|                | Medical Nutrition            | 33.79        | <b>36.55</b> | 40.69        | <b>46.38</b> | <b>42.07</b> | 37.41        | 53.10        | <b>53.10</b> | 49.66        | <b>52.24</b> | 66.21        | <b>71.03</b> |
|                | Traditional Chinese Medicine | <b>27.57</b> | 26.76        | 31.35        | <b>35.54</b> | 24.86        | <b>26.35</b> | 43.24        | <b>46.49</b> | <b>30.27</b> | 30.14        | 66.49        | <b>69.91</b> |
|                | Virology                     | 37.28        | <b>40.09</b> | 46.15        | <b>52.81</b> | 43.79        | <b>50.44</b> | <b>59.76</b> | 59.56        | <b>53.25</b> | 51.92        | 76.33        | <b>79.88</b> |
| <b>Average</b> | 31.36                        | <b>31.92</b> | 36.55        | <b>41.64</b> | 34.77        | <b>35.18</b> | 49.76        | <b>51.76</b> | 41.90        | <b>42.60</b> | 70.77        | <b>73.23</b> |              |
| French         | FrenchMedMCQA                | <b>29.91</b> | 26.64        | 29.60        | <b>40.19</b> | <b>45.48</b> | 42.68        | <b>41.74</b> | 40.29        | 55.14        | <b>56.78</b> | 63.24        | <b>72.38</b> |
|                | MedExpQA                     | 19.20        | <b>24.60</b> | 26.40        | <b>39.60</b> | <b>40.80</b> | 39.80        | <b>48.00</b> | 46.40        | 50.40        | <b>56.80</b> | 76.80        | <b>77.60</b> |
|                | Anatomy                      | 35.56        | <b>36.48</b> | 48.15        | <b>50.18</b> | 33.33        | <b>35.00</b> | <b>45.19</b> | 44.44        | 55.56        | <b>60.18</b> | 67.41        | <b>69.88</b> |
|                | Clinical Knowledge           | 32.45        | <b>36.22</b> | 50.94        | <b>56.51</b> | <b>55.47</b> | 53.68        | <b>61.89</b> | 61.38        | 65.66        | <b>68.96</b> | 78.87        | <b>78.87</b> |
|                | College Biology              | 33.33        | <b>36.11</b> | 46.53        | <b>50.69</b> | <b>53.47</b> | 51.04        | 57.64        | <b>60.19</b> | 67.36        | <b>71.88</b> | 86.81        | <b>88.89</b> |
|                | College Medicine             | 32.95        | <b>35.26</b> | 43.93        | <b>49.28</b> | <b>51.45</b> | 49.28        | 57.80        | <b>59.54</b> | 57.80        | <b>62.43</b> | 69.94        | <b>76.30</b> |
|                | Medical Genetics             | 35.00        | <b>38.75</b> | 50.00        | <b>55.50</b> | 47.00        | <b>52.25</b> | 66.00        | <b>67.33</b> | <b>71.00</b> | 69.00        | 90.00        | <b>93.33</b> |
|                | Professional Medicine        | 24.26        | <b>26.66</b> | 33.09        | <b>42.55</b> | 43.38        | <b>46.69</b> | 51.47        | <b>53.43</b> | 59.56        | <b>64.70</b> | <b>72.79</b> | 71.32        |
| <b>Average</b> | 30.33                        | <b>32.59</b> | 41.08        | <b>48.06</b> | 46.29        | <b>46.30</b> | 53.72        | <b>54.12</b> | 60.31        | <b>63.84</b> | 75.73        | <b>78.57</b> |              |
| Hindi          | Anatomy                      | 25.93        | <b>30.92</b> | 34.07        | <b>36.48</b> | <b>23.70</b> | 23.15        | 40.00        | <b>41.29</b> | 30.37        | <b>35.74</b> | 54.81        | <b>60.74</b> |
|                | Clinical Knowledge           | 26.42        | <b>27.36</b> | <b>41.89</b> | 40.38        | 24.91        | <b>31.13</b> | 48.30        | <b>48.40</b> | 35.09        | <b>39.90</b> | 69.81        | <b>70.44</b> |
|                | College Biology              | 26.39        | <b>32.64</b> | 26.39        | <b>34.89</b> | 19.44        | <b>28.47</b> | 32.64        | <b>36.98</b> | 31.25        | <b>34.89</b> | 65.28        | <b>70.14</b> |
|                | College Medicine             | 24.86        | <b>27.60</b> | 42.20        | <b>42.34</b> | 23.12        | <b>27.89</b> | 41.04        | <b>44.66</b> | 29.48        | <b>34.25</b> | 67.63        | <b>67.82</b> |
|                | Medical Genetics             | 31.00        | <b>31.75</b> | 36.00        | <b>40.75</b> | <b>28.00</b> | 27.75        | 46.00        | <b>47.25</b> | 36.00        | <b>36.25</b> | 77.00        | <b>80.67</b> |
|                | Professional Medicine        | 25.37        | <b>26.84</b> | 30.88        | <b>41.18</b> | 22.06        | <b>26.47</b> | 36.40        | <b>38.79</b> | <b>30.15</b> | 26.65        | 70.96        | <b>73.53</b> |
|                | <b>Average</b>               | 26.66        | <b>29.52</b> | 35.24        | <b>39.34</b> | 23.54        | <b>27.48</b> | 40.73        | <b>42.89</b> | 32.06        | <b>34.61</b> | 67.58        | <b>70.56</b> |
| Spanish        | HeadQA                       | 33.77        | <b>34.94</b> | 48.21        | <b>53.09</b> | <b>53.79</b> | 53.46        | 59.66        | <b>60.64</b> | 64.77        | <b>67.55</b> | 81.44        | <b>82.72</b> |
|                | MedExpQA                     | 21.60        | <b>24.00</b> | 32.80        | <b>39.40</b> | <b>46.40</b> | 41.80        | 40.00        | <b>41.07</b> | 52.80        | <b>56.00</b> | 73.60        | <b>77.07</b> |
|                | Anatomy                      | <b>37.78</b> | 35.93        | 42.22        | <b>53.89</b> | 45.93        | <b>46.30</b> | 48.15        | <b>48.15</b> | 60.74        | <b>62.04</b> | 71.11        | <b>73.83</b> |
|                | Clinical Knowledge           | <b>37.74</b> | 37.36        | 53.96        | <b>55.56</b> | <b>54.34</b> | 52.27        | 58.49        | <b>61.38</b> | 68.68        | <b>68.68</b> | 78.49        | <b>78.74</b> |
|                | College Biology              | 29.17        | <b>38.89</b> | 48.61        | <b>50.17</b> | 55.56        | <b>55.90</b> | <b>54.86</b> | 54.63        | 66.67        | <b>69.79</b> | <b>85.42</b> | 84.03        |
|                | College Medicine             | <b>32.37</b> | 31.64        | 43.93        | <b>49.42</b> | <b>54.34</b> | 48.56        | 49.71        | <b>52.60</b> | <b>59.54</b> | 56.22        | 69.94        | <b>73.80</b> |
|                | Medical Genetics             | 32.00        | <b>33.25</b> | 46.00        | <b>55.25</b> | 53.00        | <b>54.50</b> | <b>72.00</b> | 69.67        | 67.00        | <b>68.25</b> | <b>86.00</b> | 85.67        |
|                | Professional Medicine        | 26.47        | <b>28.95</b> | 38.24        | <b>44.94</b> | 47.06        | <b>48.07</b> | 51.84        | <b>51.96</b> | 53.68        | <b>58.00</b> | 69.49        | <b>69.49</b> |
| <b>Average</b> | 31.36                        | <b>33.12</b> | 44.25        | <b>50.21</b> | <b>51.30</b> | 50.11        | 54.34        | <b>55.01</b> | 61.73        | <b>63.32</b> | 76.94        | <b>78.17</b> |              |

Table S2: MedPodGPT’s zero-shot performance on non-English medical QA benchmarks. All models were fine-tuned using English medical podcast data and assessed on various multilingual medical QA benchmarks in languages including Mandarin, French, Hindi, and Spanish. Benchmarks included MedQA-MCMLE, FrenchMedMCQA, MedExpQA, HeadQA, and multiple categories within MMLU and CMMLU medical and clinical topics, covering anatomy, clinical knowledge, college medicine, medical genetics, medical nutrition, traditional Chinese medicine, virology, and professional medicine. The baseline model’s performance was compared with the performance of our model, MedPodGPT (indicated as *Ours*). Model performances are displayed to demonstrate the effectiveness of integrating podcast data into the training process. The numbers in bold font indicate the better-performing model in each category.
